# Supplementary material
Source: PubMed Central journal article supplement (PMC3143819)

S1. Grand-averaged waveforms (A) and voltage maps showing the average voltage differences, in the Late Positivity (500-700ms) time window, between responses to negative and neutral (B), positive and neutral (C), and negative and positive (D) critical words in Experiment 1 for the arousal-matched dataset.

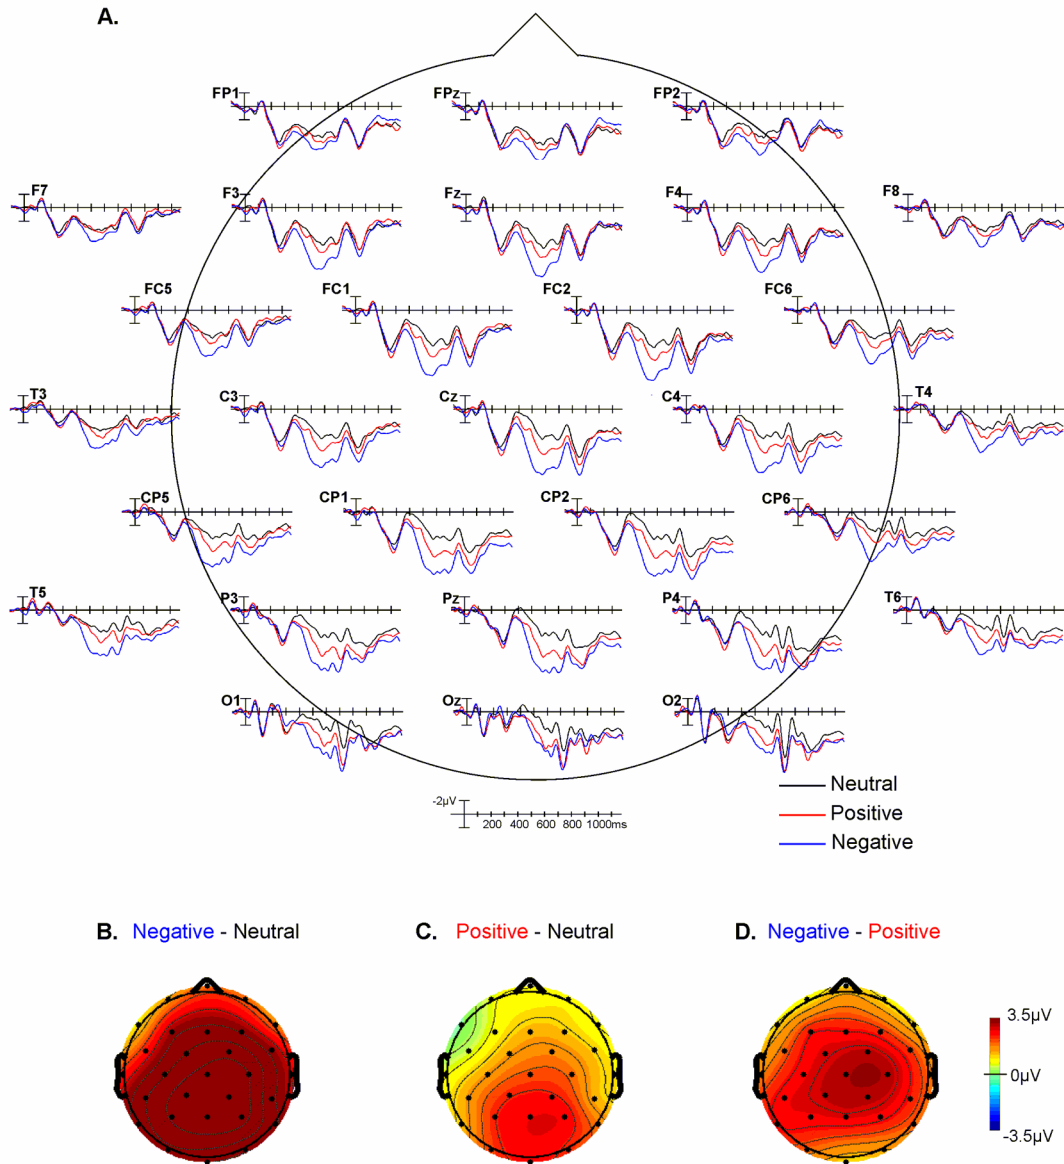

S2. Grand-averaged waveforms (A) and voltage maps showing the average voltage differences, in the Late Positivity (500-700ms) time window, between responses to negative and neutral (B), positive and neutral (C), and negative and positive (D) critical words in Experiment 1 for the cloze-matched dataset.

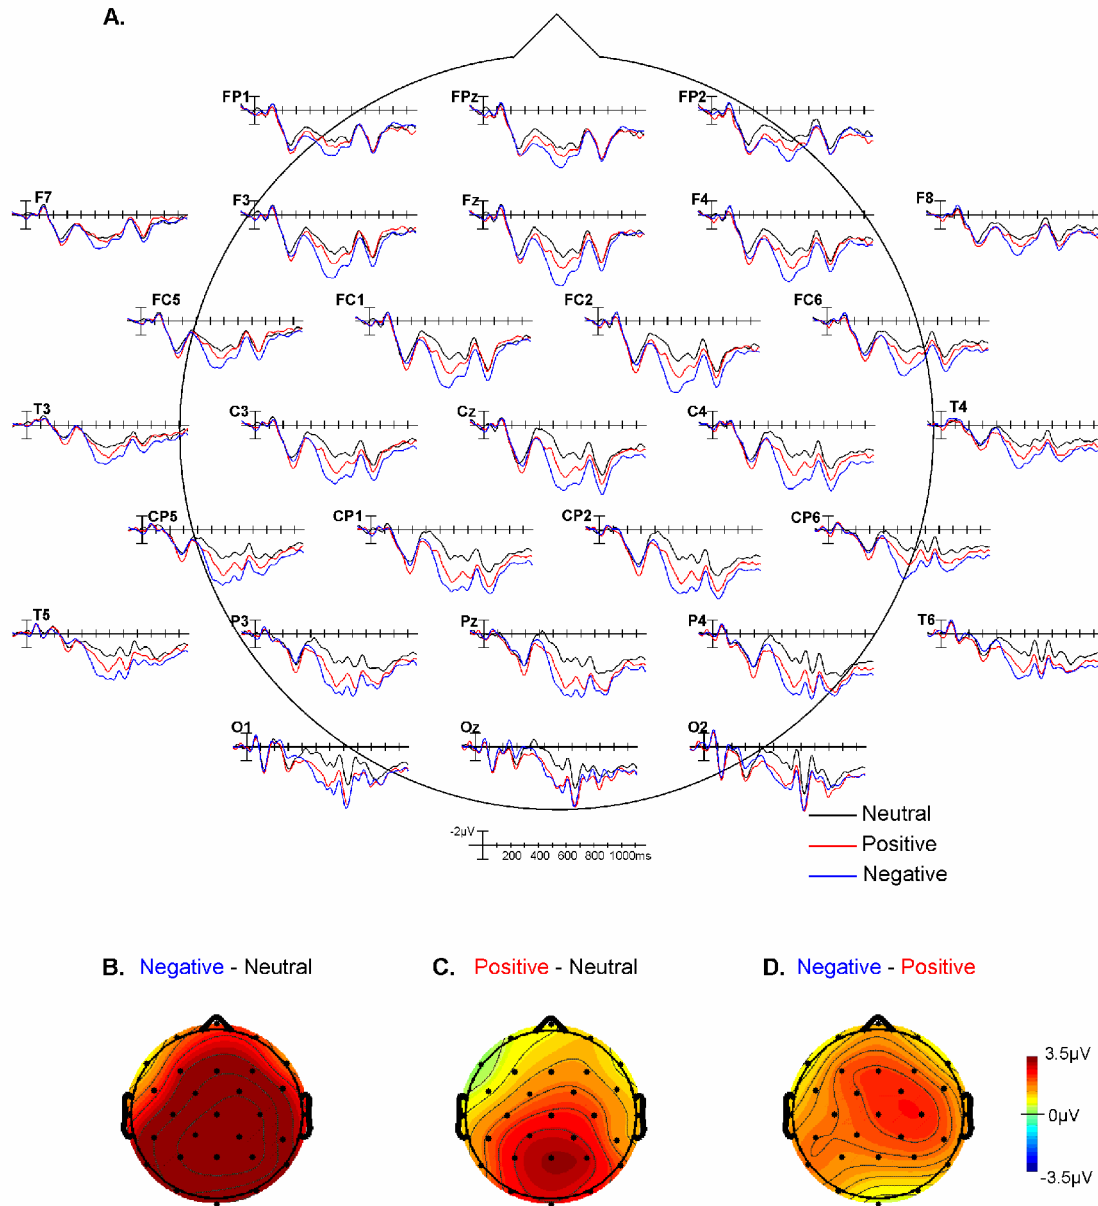

S3. Grand-averaged waveforms (A) and voltage maps showing the average voltage differences, in the Late Positivity (500-700ms) time window, between responses to negative and neutral (B), positive and neutral (C), and negative and positive (D) critical words in Experiment 1 for the plausibility-matched dataset.

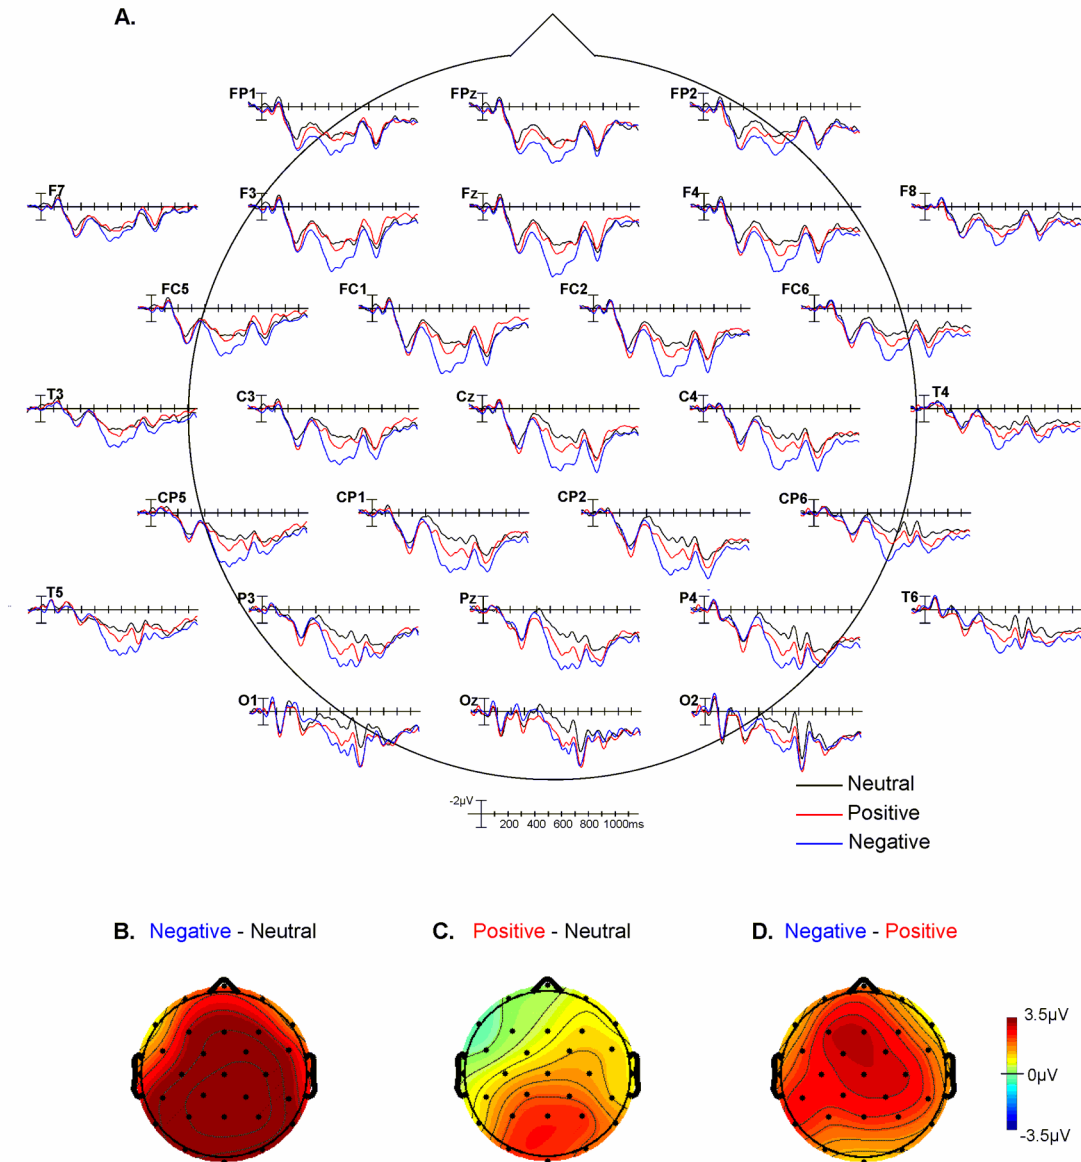

S4. Grand-averaged waveforms (A) and voltage maps showing the average voltage differences, in the N400 (325-425ms) and Late Positivity (500-700ms) time windows, between the responses to the negative and neutral (B), positive and neutral (C), and negative and positive (D) critical words in Experiment 2 for the arousal-matched dataset.

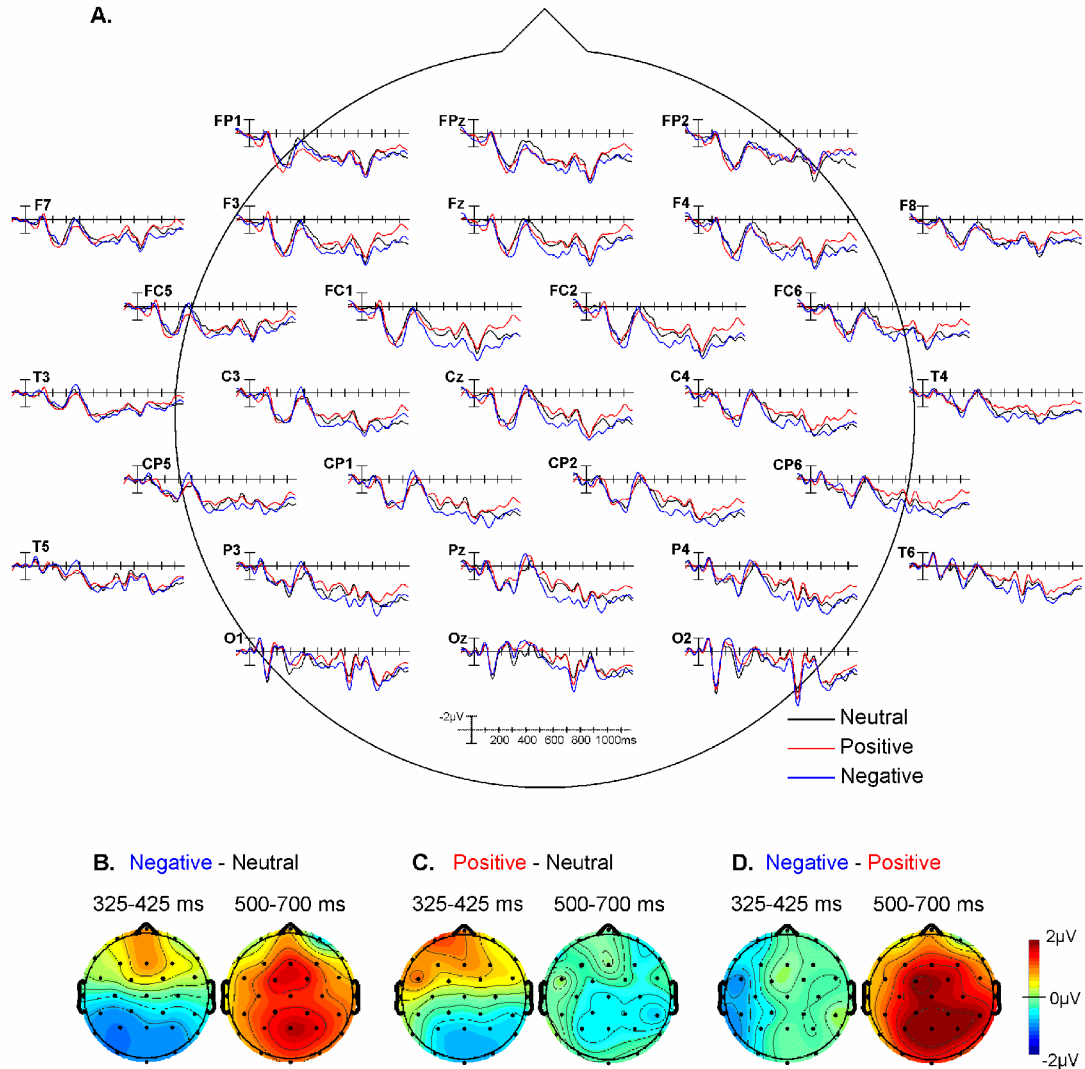

S5. Grand-averaged waveforms (A) and voltage maps showing the average voltage differences, in the N400 (325-425ms) and Late Positivity (500-700ms) time windows, between the responses to the negative and neutral (B), positive and neutral (C), and negative and positive (D) critical words in Experiment 2 for the cloze-matched dataset.

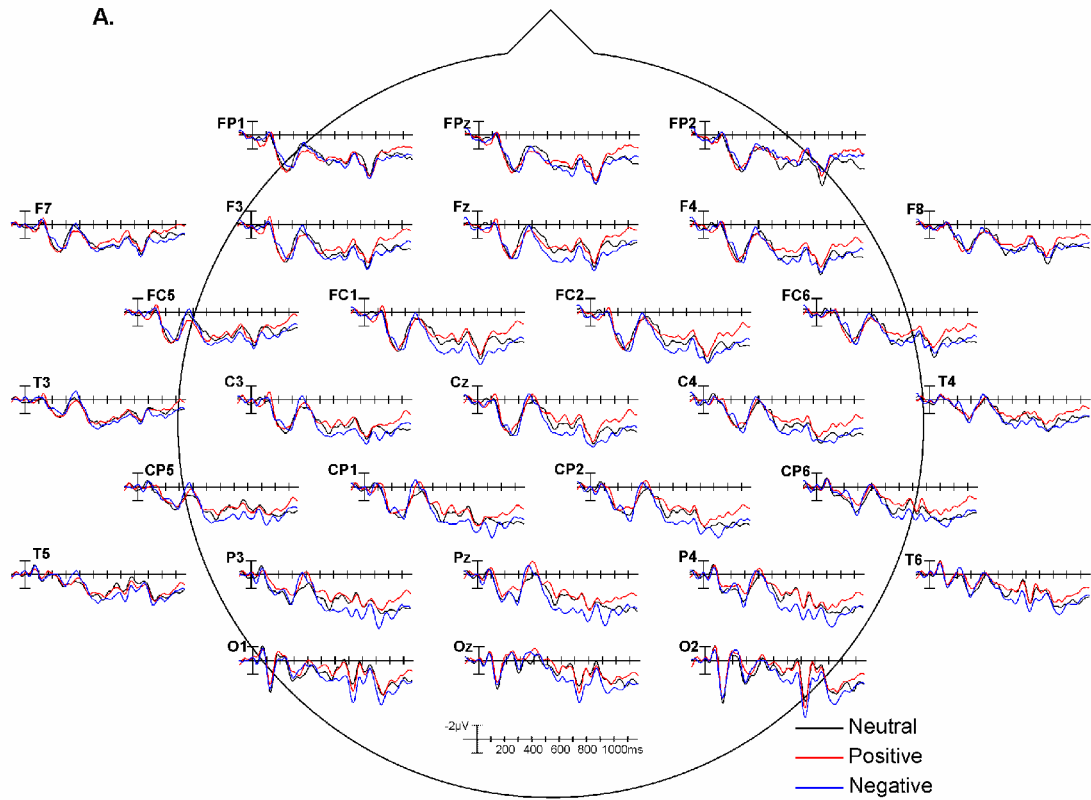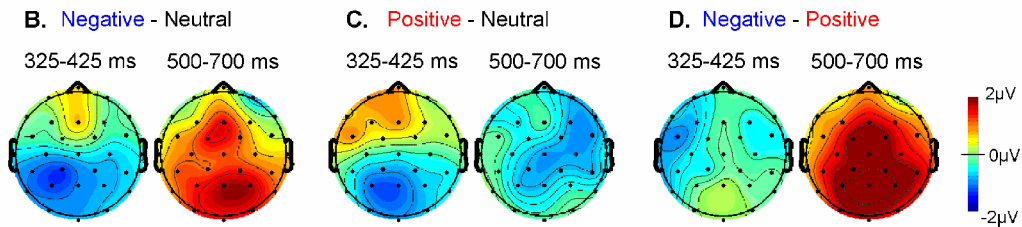

S6. Grand-averaged waveforms (A) and voltage maps showing the average voltage differences, in the N400 (325-425ms) and Late Positivity (500-700ms) time windows, between the responses to the negative and neutral (B), positive and neutral (C), and negative and positive (D) critical words in Experiment 2 for the plausibility-matched dataset.

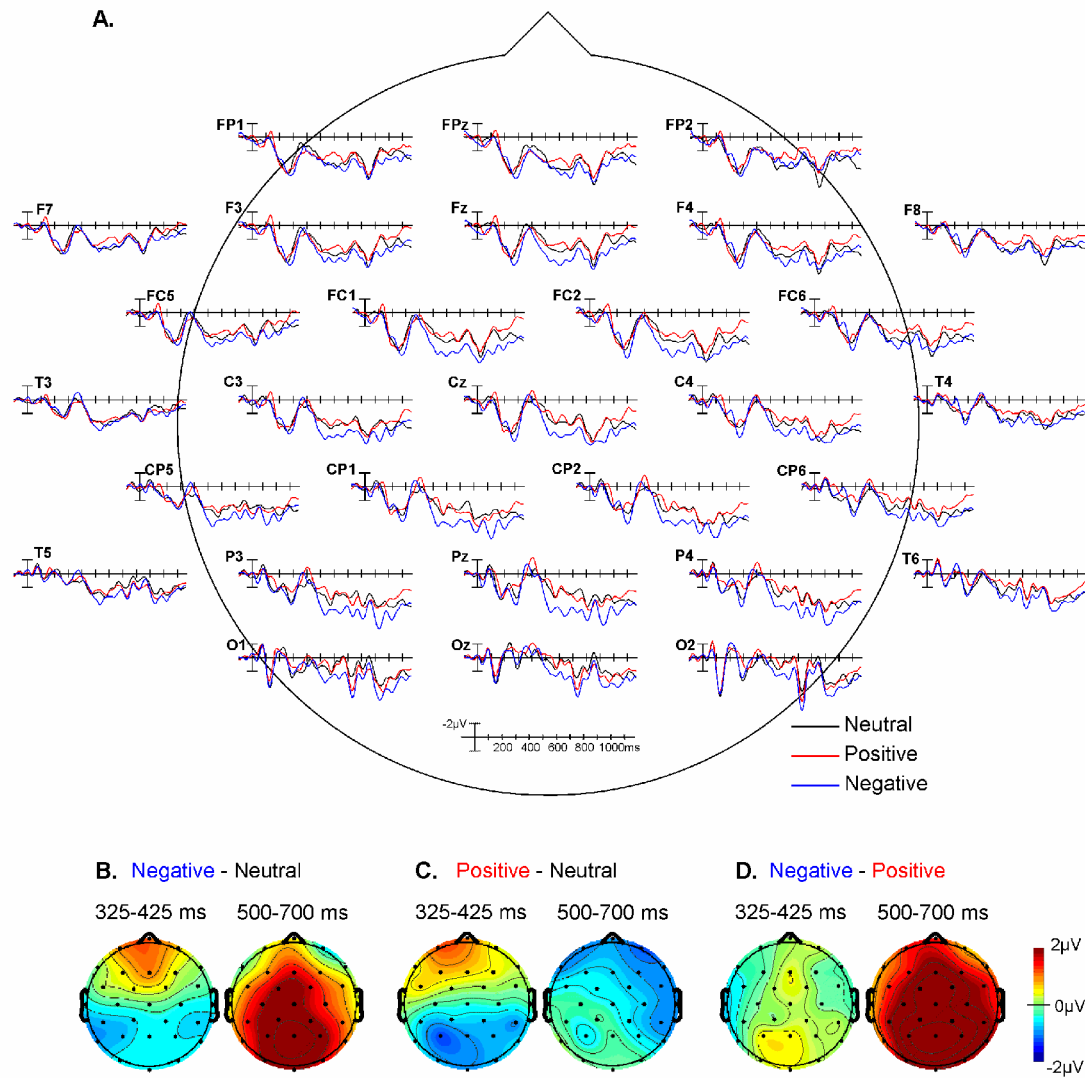

Supplement: NIHMS309954-supplement-Supplementary_figures.pdf [file NIHMS309954-supplement-Supplementary_figures.pdf]
